# Supplementary material for: A Phenome-Based Functional Analysis of Transcription Factors in the Cereal Head Blight Fungus, Fusarium graminearum
Source: PLoS Pathog. 2011 Oct 20;7(10):e1002310. doi: 10.1371/journal.ppat.1002310 (PMC3197617; doi:10.1371/journal.ppat.1002310)
Supplement: Figure S8 — Gene expression patterns of transcription factors, exhibiting defective sexual phenotypes in a deletion mutant, from perithecia development-related microarray data. 105 defective sexual phenotypes were grouped (Table S8 and Figure 3) and two microarray experiments were employed to monitor expression patterns; one is a sexual development microarray on G. zeae wild-type strain PH-1 (from 0 h to 144 h) [5] and the other is a microarray on ascospore discharge of PH-1 mutant [6]. (PDF) [file ppat.1002310.s008.pdf]

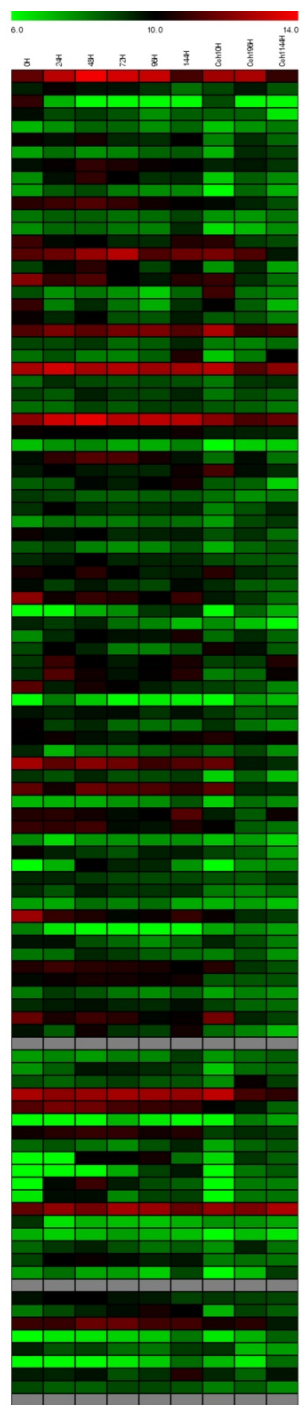

Group 1: Mutants produced more perithecia than the wild-type strain

Group 2: Mutants exhibited completely lack perithecia development

Group 3: Mutants showed decreased numbers of perithecia or delayed perithecia maturation\_normal-shaped ascospore formation

Group 4: Mutants showed decreased numbers of perithecia or delayed perithecia maturation\_abnormal-shaped ascospore formation

Group 5: Mutants showed decreased numbers of perithecia or delayed perithecia maturation\_no ascospore formation

Group 6: Mutants exhibited normal perithecia development but produced abnormally-shaped ascospores

Group 7: mutant produced neither asci nor ascospores
